# Supplementary material
Source: publisher site journal article supplement (http://www.dovepress.com/get_supplementary_file.php?f=251271.xlsx)
Supplement: Supplementary file 1 [file get_supplementary_file.php]

## Sheet: Sheet1
Table S1 Clinical data of patients with LUAD
Number	Gender	Age	Tumor size	Smoking	Lymphatic metastasis	Differentiated degree	Stage	CTC	M-CTC	E-CTC	E/M-CTC	HRR	RDW	NLR	PLR	MLR	SII	OS	OS ending	RFS	RFS ending
1	male	69	2.2	Yes	No	Moderately	Stage I	4	1	0	3	1.2	0.12	2.01111	133.889	0.316667	484.678	59	survival	59	No
2	male	49	1.5	No	No	Well	Stage I	9	2	0	7	1.10615	0.13	1.35981	108.318	0.17757	315.205	41	survival	26	Yes
3	female	61	1.9	No	No	Poorly	Stage I	5	0	0	5	0.986154	0.13	3.62245	140.51	0.346939	498.811	41	death	35	Yes
4	female	68	2.2	No	No	Poorly	Stage I	54	5	2	47	0.876923	0.13	1.25185	154.815	0.244444	261.637	57	survival	37	Yes
5	female	59	1.7	No	No	Poorly	Stage I	1	0	0	1	0.855714	0.15	1.44964	82.3741	0.151079	331.968	21	death	18	Yes
6	male	60	3	Yes	No	Poorly	Stage I	16	0	0	16	0.838571	0.15	3.96552	201.034	0.37069	924.759	38	death	54	No
7	male	52	0.6	No	No	Poorly	Stage I	4	0	4	0	0.879333	0.12	1.46154	111.239	0.188034	380.438	58	survival	58	Yes
8	male	70	1.1	No	No	Poorly	Stage I	11	0	3	8	0.964286	0.14	3.53125	132.188	0.289062	597.487	28	death	9	Yes
9	female	67	1	No	No	Poorly	Stage I	3	0	0	3	1.05385	0.13	1.20085	94.5299	0.188034	265.629	55	survival	55	No
10	female	55	1.7	No	No	Well	Stage I	14	2	1	11	0.949286	0.14	2.56923	172.154	0.251282	862.491	29	death	21	Yes
11	female	75	2.9	No	No	Poorly	Stage I	4	0	3	1	0.946429	0.14	1.42473	119.892	0.198925	317.715	26	death	39	Yes
12	female	33	2.9	No	No	Well	Stage I	2	0	0	2	0.846	0.15	1.89055	190.498	0.238806	723.891	47	survival	47	No
13	male	71	2.7	Yes	No	Moderately	Stage I	3	1	2	0	0.957143	0.14	2.44937	118.987	0.221519	460.481	10	death	3	Yes
14	male	72	2.3	No	No	Moderately	Stage I	0	0	0	0	0.713333	0.13	1.10798	96.0563	0.159624	226.693	57	survival	51	Yes
15	female	75	1	No	No	Moderately	Stage I	5	0	2	3	0.714667	0.14	1.92857	139.714	0.321429	377.229	62	survival	62	No
16	female	59	1	No	No	Moderately	Stage I	6	0	4	2	0.88	0.13	1.62782	144.925	0.24812	627.524	28	death	22	No
17	female	51	2.3	No	No	Moderately	Stage I	5	1	1	3	1.01667	0.12	1.91566	122.892	0.216867	390.795	31	death	17	Yes
18	female	55	2.9	No	No	Moderately	Stage I	1	0	0	1	1	0.13	1.85	127.5	0.1	471.75	49	survival	49	No
19	male	56	3.3	Yes	No	Poorly	Stage I	8	3	0	5	0.607143	0.14	2.27619	127.429	0.361905	304.554	43	death	27	Yes
20	female	49	3.5	No	No	Well	Stage I	9	1	4	4	0.935714	0.14	3.02643	122.467	0.268722	841.348	58	survival	44	Yes
21	male	58	3.6	No	No	Moderately	Stage I	31	0	6	25	1.23923	0.13	1.70732	74.5366	0.209756	260.878	57	survival	44	Yes
22	male	59	2.2	No	No	Moderately	Stage I	3	0	1	2	1.15714	0.14	1.65359	44.902	0.398693	113.602	62	survival	45	Yes
23	male	59	1.5	No	No	Moderately	Stage I	7	0	1	6	1.06667	0.12	1.26236	101.521	0.201521	337.049	58	survival	58	No
24	male	51	4.6	No	Yes	Poorly	Stage II	10	1	8	1	1.07692	0.13	2.06873	80.0687	0.223368	482.014	57	survival	39	Yes
25	male	65	4.2	Yes	Yes	Poorly	Stage II	16	4	2	12	0.856875	0.16	1.77108	88.9157	0.216867	392.118	55	survival	19	Yes
26	female	57	4.7	No	No	Well	Stage II	0	0	0	0	0.810667	0.15	4.84694	123.537	0.397959	1760.41	53	death	36	Yes
27	female	49	3.5	No	Yes	Well	Stage II	68	17	4	47	0.728571	0.14	5.19853	309.559	0.683824	2188.58	59	survival	22	Yes
28	male	43	3.9	No	No	Moderately	Stage II	10	0	2	8	1.13462	0.13	3.43617	398.404	0.585106	1286.85	63	survival	63	No
29	female	73	4.2	No	No	Moderately	Stage II	2	0	2	0	0.887143	0.14	4.18803	154.444	0.299145	756.778	13	death	9	Yes
30	female	65	4.6	No	No	Moderately	Stage II	6	2	1	3	0.924286	0.14	1.28175	109.563	0.202381	353.89	52	death	31	Yes
31	female	58	3.5	No	No	Moderately	Stage II	3	1	2	0	0.786667	0.15	2.6	195.333	0.2	761.8	57	survival	57	No
32	male	45	2.3	No	Yes	Poorly	Stage II	1	1	0	0	1.15833	0.15	4.63636	154.545	0.472727	788.182	18	death	9	Yes
33	male	53	5.22	Yes	Yes	Poorly	Stage II	9	0	0	9	0.946154	0.15	2.10169	84.5339	0.163136	838.576	15	death	9	Yes
34	male	54	4.9	No	Yes	Poorly	Stage II	3	1	1	1	1.03846	0.15	4.74706	118.824	0.576471	958.906	13	death	5	Yes
35	female	47	4.3	No	Yes	Poorly	Stage II	3	0	0	3	0.924286	0.14	1.27962	150.427	0.270142	406.152	57	survival	51	Yes
36	male	58	3	Yes	Yes	Moderately	Stage II	2	0	1	1	1.03214	0.14	4.07514	168.671	0.537572	1189.13	55	survival	44	Yes
37	female	79	2.3	No	Yes	Moderately	Stage II	13	3	2	8	0.673529	0.17	1.41803	86.8033	0.163934	300.339	42	survival	23	Yes
38	male	53	3.7	No	Yes	Poorly	Stage III	6	1	1	4	1.27917	0.15	2.46479	140.61	0.300469	738.204	18	death	7	Yes
39	male	59	5	No	Yes	Poorly	Stage III	0	1	0	0	1.10286	0.15	6.19231	235.673	0.567308	1517.73	11	death	5	Yes
40	male	51	4.6	Yes	Yes	Poorly	Stage III	16	5	1	10	0.86375	0.16	2.84914	139.871	0.24569	924.545	2	death	1	Yes
41	male	64	10	Yes	Yes	Poorly	Stage III	15	4	1	10	1.18333	0.15	4.69942	110.983	0.33526	902.289	11	death	3	Yes
42	male	70	8	Yes	Yes	Poorly	Stage III	9	0	3	6	1.01429	0.15	4.69942	110.983	0.33526	902.289	21	death	17	Yes
43	female	57	4.8	No	Yes	Poorly	Stage III	10	0	7	3	0.953846	0.13	2.23684	192	0.357895	816	56	survival	56	No
44	female	70	4.8	No	Yes	Poorly	Stage III	3	2	0	1	0.93	0.13	1.79693	117.854	0.206897	552.737	27	death	11	Yes
45	female	65	2.2	No	Yes	Poorly	Stage III	1	0	0	1	0.936429	0.14	1.60588	165.824	0.205882	452.698	42	survival	37	Yes
46	female	69	2.4	No	Yes	Poorly	Stage III	4	3	0	1	0.924615	0.13	1.58242	159.011	0.263736	457.952	7	death	3	Yes
47	female	63	3.7	No	Yes	Poorly	Stage III	4	3	0	1	0.614	0.15	2.88889	301.667	0.416667	1568.67	5	death	2	Yes
48	female	69	3.7	No	Yes	Moderately	Stage III	2	0	0	2	1.04167	0.12	1.553	93.0876	0.115207	313.705	49	death	49	No
49	male	56	3.8	Yes	Yes	Poorly	Stage III	10	1	6	3	1.05833	0.12	4.92079	273.267	0.693069	1358.14	6	death	5	Yes
50	male	64	9	Yes	Yes	Poorly	Stage III	2	0	0	2	1.27273	0.11	2.96403	123.741	0.431655	509.813	15	death	11	Yes
51	female	64	2.3	No	Yes	Moderately	Stage III	43	1	6	36	0.718667	0.13	29.2727	359.636	1.16364	5790.15	62	survival	62	No
52	male	52	6.2	Yes	Yes	Poorly	Stage III	26	3	0	23	0.869231	0.13	5.38739	222.523	0.576577	1330.68	21	death	11	Yes
53	male	65	2.4	Yes	Yes	Poorly	Stage III	16	7	0	9	1.04385	0.13	1.60227	153.636	0.272727	433.255	6	death	4	Yes
54	female	46	3.7	No	Yes	Poorly	Stage III	1	0	0	1	0.874	0.15	4.28777	398.993	0.561151	2378	31	death	11	Yes
55	female	69	2.4	No	Yes	Moderately	Stage IV	2	1	0	1	0.98	0.13	2.66981	91.0377	0.150943	515.274	54	survival	54	No
56	female	63	6	No	Yes	Moderately	Stage IV	1	1	0	0	0.930769	0.13	4.5	175.714	0.307143	1107	14	death	7	Yes
57	male	57	2.3	No	Yes	Moderately	Stage IV	3	0	3	0	0.902857	0.14	2.6729	200.187	0.35514	572.535	57	survival	27	Yes
58	male	69	8.2	Yes	Yes	Moderately	Stage IV	10	3	4	3	0.850714	0.15	12.5278	315	1.48611	2841.3	2	death	1	Yes
59	male	49	2.6	No	Yes	Moderately	Stage IV	17	6	0	11	1.23917	0.15	5	254.796	0.591837	1248.5	10	death	4	Yes
60	female	58	2.6	No	Yes	Moderately	Stage IV	20	3	0	17	1.08786	0.14	1.16406	49.9219	0.1875	148.767	55	survival	55	No
